# Supplementary material
Source: HighWire-hosted journal article supplement (https://bmjopen.bmj.com/content/11/6/e042845)
Supplement: inline-supplementary-material-1 [file inline-supplementary-material-1.pdf]

## Supplementary tables

| Population                   | Year 1             |                 | Year 2             |                 | Year 3             |                 | Year 4             |                 |
|------------------------------|--------------------|-----------------|--------------------|-----------------|--------------------|-----------------|--------------------|-----------------|
|                              | ARI(CI)            | RR(CI)          | ARI(CI)            | RR(CI)          | ARI(CI)            | RR(CI)          | ARI(CI)            | RR(CI)          |
| Total                        | 0.00(0.00;0.00)    | 0.84(0.80;0.88) | 0.00(0.00;0.00)    | 0.91(0.85;0.97) | 0.00(0.00;0.00)    | 0.90(0.84;0.96) | 0.00(0.00;0.00)    | 0.87(0.83;0.92) |
| Grouped by sex               |                    |                 |                    |                 |                    |                 |                    |                 |
| Female                       | 0.00(0.00;0.00)    | 0.83(0.79;0.88) | 0.00(0.00;0.00)    | 0.94(0.88;1.00) | 0.00(0.00;0.00)    | 0.93(0.87;1.00) | 0.00(0.00;0.00)    | 0.84(0.79;0.89) |
| Male                         | 0.00(0.00;0.00)    | 0.94(0.85;1.03) | 0.00(0.00;0.00)    | 0.82(0.71;0.92) | 0.00(-0.01;0.00)   | 0.83(0.73;0.94) | 0.00(0.00;0.00)    | 1.11(0.99;1.23) |
| Grouped by age               |                    |                 |                    |                 |                    |                 |                    |                 |
| ]18 – 30] years              | 0.01(0.00;0.01)    | 1.30(1.17;1.42) | 0.00(0.00;0.00)    | 0.98(0.87;1.09) | 0.00(0.00;0.01)    | 1.00(0.90;1.11) | 0.00(0.00;0.00)    | 1.23(1.09;1.38) |
| ]30 – 40] years              | -0.01(-0.01;0.00)  | 0.71(0.65;0.76) | 0.00(-0.01;0.00)   | 0.88(0.81;0.95) | 0.00(0.00;0.00)    | 0.90(0.82;0.98) | -0.01(-0.01;0.00)  | 0.69(0.62;0.76) |
| ]40 – 50] years              | 0.00(0.00;0.00)    | 0.94(0.87;1.00) | 0.00(0.00;0.00)    | 0.99(0.90;1.08) | 0.00(0.00;0.00)    | 1.07(0.97;1.17) | 0.01(0.00;0.01)    | 1.14(1.05;1.23) |
| ]50 – 60] years              | -0.01(-0.01;0.00)  | 0.74(0.62;0.85) | -0.01(-0.01;-0.01) | 0.98(0.84;1.11) | 0.00(-0.01;0.00)   | 0.56(0.50;0.63) | -0.01(-0.01;-0.01) | 0.78(0.67;0.89) |
| Grouped by education         |                    |                 |                    |                 |                    |                 |                    |                 |
| Short education or unskilled | -0.01(-0.01;0.00)  | 0.91(0.84;0.97) | -0.01(-0.01;0.00)  | 0.80(0.73;0.88) | 0.00(0.00;0.00)    | 0.82(0.74;0.89) | -0.01(-0.01;0.00)  | 0.75(0.67;0.82) |
| Craftsmen or office          | 0.00(0.00;0.00)    | 0.75(0.67;0.84) | -0.01(-0.01;-0.01) | 1.05(0.96;1.14) | 0.00(0.00;0.00)    | 1.00(0.90;1.09) | 0.00(0.00;0.00)    | 0.93(0.86;0.99) |
| Bachelor or Master degree    | 0.00(0.00;0.00)    | 0.71(0.62;0.80) | 0.00(0.00;0.00)    | 0.70(0.59;0.81) | 0.00(0.00;0.00)    | 0.92(0.81;1.04) | 0.00(0.00;0.00)    | 0.75(0.67;0.84) |
| Interdisciplinary            | 0.01(0.00;0.01)    | 1.04(0.95;1.13) | 0.00(0.00;0.00)    | 1.22(1.11;1.34) | 0.01(0.00;0.01)    | 1.09(0.99;1.20) | 0.00(0.00;0.00)    | 1.25(1.16;1.34) |
|                              | Year 5             |                 | Year 6             |                 | Year 7             |                 |                    |                 |
| Population                   | AR(CI)             | RR(CI)          | ARI(CI)            | RR(CI)          | ARI(CI)            | RR(CI)          |                    |                 |
| Total                        | 0.00(0.00;0.00)    | 0.76(0.72;0.80) | 0.00(0.00;0.00)    | 0.93(0.88;0.99) | 0.00(0.00;0.00)    | 0.90(0.85;0.94) |                    |                 |
| Grouped by sex               |                    |                 |                    |                 |                    |                 |                    |                 |
| Female                       | 0.00(0.00;0.00)    | 0.78(0.74;0.82) | 0.00(0.00;0.00)    | 0.99(0.93;1.06) | 0.00(0.00;0.00)    | 0.91(0.86;0.96) |                    |                 |
| Male                         | 0.00(0.00;0.00)    | 0.80(0.72;0.89) | 0.00(0.00;0.00)    | 0.74(0.66;0.83) | 0.00(0.00;0.00)    | 0.97(0.86;1.10) |                    |                 |
| Grouped by age               |                    |                 |                    |                 |                    |                 |                    |                 |
| ]18 – 30] years              | 0.00(0.00;0.00)    | 0.83(0.75;0.92) | 0.00(0.00;0.00)    | 1.21(1.10;1.34) | 0.00(0.00;0.00)    | 0.85(0.78;0.93) |                    |                 |
| ]30 – 40] years              | 0.00(-0.01;0.00)   | 0.70(0.64;0.76) | 0.00(0.00;0.00)    | 0.77(0.71;0.83) | 0.00(0.00;0.00)    | 0.69(0.63;0.75) |                    |                 |
| ]40 – 50] years              | 0.00(0.00;0.00)    | 0.95(0.88;1.01) | 0.00(0.00;0.00)    | 1.07(0.99;1.14) | 0.00(0.00;0.00)    | 1.50(1.35;1.64) |                    |                 |
| ]50 – 60] years              | -0.01(-0.01;-0.01) | 0.69(0.59;0.79) | 0.00(0.00;0.00)    | 1.30(1.04;1.56) | -0.01(-0.01;-0.01) | 0.96(0.73;1.19) |                    |                 |
| Grouped by education         |                    |                 |                    |                 |                    |                 |                    |                 |
| Short education or unskilled | 0.00(0.00;0.00)    | 0.76(0.71;0.82) | 0.00(-0.01;0.00)   | 0.89(0.82;0.97) | 0.00(-0.01;0.00)   | 0.74(0.67;0.81) |                    |                 |
| Craftsmen or office          | -0.01(-0.01;0.00)  | 0.68(0.62;0.74) | 0.00(0.00;0.00)    | 0.99(0.89;1.10) | 0.00(0.00;0.00)    | 1.21(1.07;1.35) |                    |                 |
| Bachelor or Master degree    | 0.00(0.00;0.00)    | 0.91(0.81;1.02) | 0.00(0.00;0.00)    | 0.88(0.79;0.99) | 0.00(0.00;0.01)    | 0.86(0.77;0.96) |                    |                 |
| Interdisciplinary            | 0.00(0.00;0.00)    | 0.95(0.87;1.02) | 0.00(0.00;0.00)    | 1.34(1.20;1.49) | 0.00(0.00;0.00)    | 1.13(1.04;1.22) |                    |                 |

**Table 1 supplementary:** Absolute risk increase (ARI) and relative risk (RR) with 95% confidence intervals (CI) of a case vs. a control subject being **part time employed** from one year to seven years after bariatric surgery.

| Population                   | Year 1             |                 | Year 2             |                 | Year 3             |                 | Year 4             |                 |
|------------------------------|--------------------|-----------------|--------------------|-----------------|--------------------|-----------------|--------------------|-----------------|
|                              | ARI(CI)            | RR(CI)          | ARI(CI)            | RR(CI)          | ARI(CI)            | RR(CI)          | ARI(CI)            | RR(CI)          |
| Total                        | -0.01(-0.02;-0.01) | 0.89(0.87;0.90) | -0.01(-0.01;0.00)  | 0.97(0.96;0.99) | -0.01(-0.01;0.00)  | 0.96(0.94;0.97) | -0.02(-0.02;-0.01) | 0.95(0.94;0.96) |
| Grouped by sex               |                    |                 |                    |                 |                    |                 |                    |                 |
| Female                       | -0.01(-0.02;-0.01) | 0.90(0.88;0.92) | -0.01(-0.01;-0.01) | 0.99(0.98;1.00) | -0.01(-0.01;0.00)  | 0.96(0.94;0.97) | -0.01(-0.02;-0.01) | 0.95(0.94;0.96) |
| Male                         | -0.01(-0.02;-0.01) | 0.87(0.84;0.89) | 0.00(-0.01;0.00)   | 0.93(0.89;0.97) | -0.01(-0.02;0.00)  | 0.96(0.93;0.99) | -0.03(-0.04;-0.02) | 0.94(0.91;0.97) |
| Grouped by age               |                    |                 |                    |                 |                    |                 |                    |                 |
| ]18 – 30] years              | 0.00(-0.01;0.00)   | 1.01(0.96;1.05) | 0.01(0.01;0.02)    | 1.04(1.03;1.04) | 0.02(0.01;0.02)    | 1.02(1.01;1.03) | 0.02(0.01;0.03)    | 1.01(1.00;1.02) |
| ]30 – 40] years              | -0.02(-0.02;-0.01) | 0.86(0.84;0.88) | -0.02(-0.03;-0.02) | 0.97(0.95;0.98) | -0.02(-0.02;-0.02) | 0.95(0.93;0.96) | -0.04(-0.04;-0.03) | 0.94(0.92;0.95) |
| ]40 – 50] years              | -0.02(-0.03;-0.02) | 0.87(0.85;0.90) | -0.01(-0.01;0.00)  | 0.93(0.90;0.96) | -0.01(-0.01;0.00)  | 0.90(0.87;0.92) | -0.01(-0.01;0.00)  | 0.88(0.86;0.90) |
| ]50 – 60] years              | 0.00(0.00;0.01)    | 0.90(0.86;0.93) | 0.00(0.00;0.01)    | 0.98(0.96;1.01) | -0.01(-0.02;-0.01) | 0.93(0.90;0.97) | -0.04(-0.05;-0.03) | 1.00(0.98;1.02) |
| Grouped by education         |                    |                 |                    |                 |                    |                 |                    |                 |
| Short education or unskilled | -0.01(-0.02;-0.01) | 0.92(0.90;0.93) | 0.01(0.00;0.01)    | 0.94(0.93;0.96) | -0.01(-0.01;0.00)  | 0.94(0.92;0.96) | -0.01(-0.01;0.00)  | 0.93(0.91;0.95) |
| Craftsmen or office          | -0.06(-0.06;-0.05) | 0.70(0.67;0.73) | -0.06(-0.07;-0.06) | 0.80(0.77;0.82) | -0.05(-0.06;-0.05) | 0.75(0.73;0.76) | -0.06(-0.06;-0.05) | 0.74(0.73;0.76) |
| Bachelor or Master degree    | 0.02(0.01;0.02)    | 0.93(0.91;0.95) | 0.01(0.01;0.01)    | 1.14(1.12;1.16) | 0.01(0.01;0.02)    | 1.15(1.13;1.17) | 0.00(0.00;0.01)    | 1.17(1.15;1.19) |
| Interdisciplinary            | -0.01(-0.02;-0.01) | 0.87(0.85;0.90) | 0.00(-0.01;0.00)   | 0.97(0.94;1.00) | 0.00(0.00;0.01)    | 0.94(0.91;0.97) | -0.02(-0.02;-0.01) | 0.92(0.89;0.95) |
|                              | Year 5             |                 | Year 6             |                 | Year 7             |                 |                    |                 |
| Population                   | ARI(CI)            | RR(CI)          | ARI(CI)            | RR(CI)          | ARI(CI)            | RR(CI)          |                    |                 |
| Total                        | -0.03(-0.03;-0.02) | 0.98(0.96;0.99) | 0.00(-0.01;0.00)   | 0.99(0.98;1.01) | -0.01(-0.01;-0.01) | 0.97(0.95;0.99) |                    |                 |
| Grouped by sex               |                    |                 |                    |                 |                    |                 |                    |                 |
| Female                       | -0.03(-0.03;-0.02) | 0.98(0.97;0.99) | 0.00(0.00;0.00)    | 1.00(0.99;1.01) | 0.00(0.00;0.00)    | 0.99(0.97;1.01) |                    |                 |
| Male                         | -0.02(-0.03;-0.02) | 0.98(0.96;1.01) | -0.01(-0.02;0.00)  | 0.97(0.93;1.00) | -0.01(-0.02;0.00)  | 1.05(1.04;1.06) |                    |                 |
| Grouped by age               |                    |                 |                    |                 |                    |                 |                    |                 |
| ]18 – 30] years              | -0.01(-0.03;0.00)  | 1.05(1.04;1.06) | 0.01(0.01;0.01)    | 1.08(1.06;1.09) | 0.01(0.00;0.01)    | 1.11(1.09;1.13) |                    |                 |
| ]30 – 40] years              | -0.03(-0.04;-0.03) | 0.93(0.92;0.95) | 0.00(-0.01;0.00)   | 0.94(0.93;0.96) | -0.01(-0.02;-0.01) | 0.89(0.87;0.91) |                    |                 |
| ]40 – 50] years              | -0.02(-0.03;-0.02) | 0.95(0.93;0.98) | -0.01(-0.01;0.00)  | 0.97(0.95;1.03) | -0.02(-0.02;-0.01) | 0.99(0.95;1.02) |                    |                 |
| ]50 – 60] years              | -0.02(-0.02;-0.01) | 1.03(1.00;1.06) | 0.00(0.00;0.00)    | 0.93(0.89;0.97) | -0.01(-0.02;0.00)  | 0.77(0.73;0.80) |                    |                 |
| Grouped by education         |                    |                 |                    |                 |                    |                 |                    |                 |
| Short education or unskilled | -0.01(-0.02;-0.01) | 1.02(1.00;1.04) | -0.01(-0.01;-0.01) | 0.97(0.95;0.99) | -0.01(-0.02;-0.01) | 0.97(0.95;0.99) |                    |                 |
| Craftsmen or office          | -0.06(-0.07;-0.06) | 0.73(0.71;0.74) | -0.04(-0.05;-0.03) | 0.78(0.76;0.80) | -0.05(-0.06;-0.05) | 0.78(0.76;0.80) |                    |                 |
| Bachelor or Master degree    | -0.01(-0.02;-0.01) | 1.13(1.11;1.15) | 0.02(0.02;0.02)    | 1.18(1.16;1.21) | 0.02(0.02;0.02)    | 1.13(1.11;1.14) |                    |                 |
| Interdisciplinary            | -0.02(-0.03;-0.02) | 0.97(0.94;1.00) | 0.00(0.00;0.01)    | 1.00(0.98;1.03) | -0.01(-0.01;0.00)  | 0.94(0.91;0.98) |                    |                 |

**Table 2 supplementary:** Absolute risk increase (ARI) and relative risk (RR) with 95% confidence intervals (CI) of a case vs. a control subject being **unemployed** from one year to seven years after bariatric surgery.

| Population                   | Year 1             |                 | Year 2             |                 | Year 3             |                 | Year 4             |                 |
|------------------------------|--------------------|-----------------|--------------------|-----------------|--------------------|-----------------|--------------------|-----------------|
|                              | ARI(CI)            | RR(CI)          | ARI(CI)            | RR(CI)          | ARI(CI)            | RR(CI)          | ARI(CI)            | RR(CI)          |
| Total                        | 0.00(0.00;0.00)    | 0.66(0.65;0.66) | 0.00(0.00;0.00)    | 0.75(0.75;0.76) | 0.01(0.01;0.01)    | 0.90(0.89;0.90) | 0.02(0.02;0.02)    | 0.98(0.97;0.99) |
| Grouped by sex               |                    |                 |                    |                 |                    |                 |                    |                 |
| Female                       | 0.00(0.00;0.00)    | 0.71(0.70;0.70) | 0.01(0.01;0.01)    | 0.82(0.81;0.83) | 0.02(0.01;0.02)    | 1.00(0.99;1.00) | 0.02(0.02;0.02)    | 1.07(1.06;1.08) |
| Male                         | -0.02(-0.02;-0.02) | 0.48(0.47;0.48) | -0.02(-0.02;-0.02) | 0.50(0.49;0.51) | -0.01(-0.01;-0.01) | 0.55(0.54;0.56) | -0.01(-0.01;0.00)  | 0.63(0.62;0.64) |
| Grouped by age               |                    |                 |                    |                 |                    |                 |                    |                 |
| ]18 – 30] years              | -0.01(-0.01;-0.01) | 0.78(0.76;0.80) | 0.00(0.00;0.00)    | 0.78(0.86;0.80) | 0.00(0.00;0.00)    | 0.76(0.75;0.78) | 0.01(0.00;0.01)    | 0.80(0.79;0.82) |
| ]30 – 40] years              | 0.00(0.00;0.00)    | 0.75(0.74;0.76) | 0.00(0.00;0.00)    | 0.82(0.81;0.83) | 0.01(0.01;0.01)    | 0.94(0.93;0.95) | 0.02(0.02;0.02)    | 1.01(1.00;1.03) |
| ]40 – 50] years              | 0.01(0.01;0.01)    | 0.59(0.58;0.61) | 0.01(0.01;0.01)    | 0.75(0.74;0.76) | 0.03(0.03;0.03)    | 1.01(1.00;1.02) | 0.03(0.03;0.03)    | 1.10(1.09;1.11) |
| ]50 – 60] years              | -0.03(-0.03;-0.02) | 0.54(0.53;0.55) | -0.02(-0.02;-0.02) | 0.57(0.57;0.58) | -0.02(-0.02;-0.02) | 0.64(0.63;0.65) | -0.02(-0.02;-0.02) | 0.69(0.68;0.70) |
| Grouped by education         |                    |                 |                    |                 |                    |                 |                    |                 |
| Short education or unskilled | -0.01(-0.01;-0.01) | 0.53(0.52;0.54) | -0.01(-0.01;-0.01) | 0.60(0.58;0.61) | -0.01(-0.01;-0.01) | 0.74(0.73;0.75) | 0.00(0.00;0.00)    | 0.82(0.81;0.83) |
| Craftsmen or office          | 0.00(0.00;0.00)    | 0.64(0.63;0.66) | 0.00(0.00;0.00)    | 0.75(0.74;0.76) | 0.01(0.00;0.01)    | 0.89(0.88;0.90) | 0.01(0.01;0.01)    | 0.96(0.93;0.98) |
| Bachelor or Master degree    | 0.01(0.01;0.01)    | 0.91(0.88;0.94) | 0.01(0.01;0.01)    | 0.95(0.93;0.97) | 0.02(0.02;0.02)    | 1.13(1.11;1.15) | 0.02(0.02;0.02)    | 1.21(1.19;1.24) |
| Interdisciplinary            | 0.01(0.01;0.01)    | 0.95(0.94;0.96) | 0.01(0.01;0.01)    | 0.97(0.96;0.98) | 0.02(0.02;0.02)    | 1.08(1.07;1.10) | 0.03(0.03;0.03)    | 1.17(1.15;1.19) |
|                              |                    |                 |                    |                 |                    |                 |                    |                 |
|                              | Year 5             |                 | Year 6             |                 | Year 7             |                 |                    |                 |
| Population                   | AR(CI)             | RR(CI)          | ARI(CI)            | RR(CI)          | ARI(CI)            | RR(CI)          |                    |                 |
| Total                        | -0.02(-0.02;-0.02) | 0.99(0.99;1.00) | -0.01(-0.02;-0.01) | 1.09(1.09;1.10) | -0.01(-0.01;-0.01) | 1.15(1.14;1.16) |                    |                 |
| Grouped by sex               |                    |                 |                    |                 |                    |                 |                    |                 |
| Female                       | -0.02(-0.02;-0.02) | 1.08(1.07;1.08) | -0.01(-0.01;-0.01) | 1.18(1.18;1.19) | 0.00(0.00;0.00)    | 1.24(1.23;1.25) |                    |                 |
| Male                         | -0.03(-0.03;-0.03) | 0.68(0.67;0.69) | -0.03(-0.03;-0.03) | 0.76(0.75;0.77) | -0.03(-0.03;-0.03) | 0.79(0.78;0.80) |                    |                 |
| Grouped by age               |                    |                 |                    |                 |                    |                 |                    |                 |
| ]18 – 30] years              | -0.01(-0.01;-0.01) | 0.88(0.86;0.91) | -0.01(-0.01;-0.01) | 0.98(0.95;1.01) | -0.01(-0.01;-0.01) | 1.11(1.08;1.14) |                    |                 |
| ]30 – 40] years              | -0.01(-0.01;-0.01) | 1.07(0.99;1.03) | -0.01(-0.01;-0.01) | 1.07(1.06;1.08) | 0.00(0.00;0.00)    | 1.16(1.13;1.18) |                    |                 |
| ]40 – 50] years              | -0.03(-0.03;-0.03) | 1.10(1.09;1.11) | -0.02(-0.02;-0.02) | 1.25(1.24;1.26) | 0.00(0.00;0.00)    | 1.30(1.28;1.31) |                    |                 |
| ]50 – 60] years              | -0.04(-0.04;-0.04) | 0.72(0.71;0.74) | -0.03(-0.03;-0.03) | 0.83(0.81;0.84) | -0.03(-0.03;-0.03) | 0.78(0.77;0.79) |                    |                 |
| Grouped by education         |                    |                 |                    |                 |                    |                 |                    |                 |
| Short education or unskilled | -0.04(-0.04;-0.04) | 0.78(0.77;0.79) | -0.03(-0.03;-0.03) | 0.84(0.83;0.85) | -0.02(-0.02;-0.02) | 0.87(0.85;0.88) |                    |                 |
| Craftsmen or office          | -0.02(-0.02;-0.02) | 1.01(0.99;1.03) | -0.02(-0.02;-0.01) | 1.03(1.01;1.06) | -0.01(-0.01;-0.01) | 1.03(1.00;1.05) |                    |                 |
| Bachelor or Master degree    | 0.00(-0.01;0.00)   | 1.30(1.27;1.33) | 0.00(0.00;0.00)    | 1.61(1.58;1.63) | 0.00(0.00;0.00)    | 1.62(1.57;1.67) |                    |                 |
| Interdisciplinary            | 0.00(0.00;0.00)    | 1.30(1.28;1.32) | 0.00(0.00;0.00)    | 1.52(1.51;1.56) | 0.00(0.00;0.00)    | 1.63(1.61;1.66) |                    |                 |

**Table 3 supplementary:** Absolute risk increase (ARI) and relative risk (RR) with 95% confidence intervals (CI) of a case vs. a control subject being in the “Flex” state from one year to seven years after bariatric surgery.

| Population                   | Year 1             |                 | Year 2             |                 | Year 3             |                 | Year 4             |                 |
|------------------------------|--------------------|-----------------|--------------------|-----------------|--------------------|-----------------|--------------------|-----------------|
|                              | ARI(CI)            | RR(CI)          | ARI(CI)            | RR(CI)          | ARI(CI)            | RR(CI)          | ARI(CI)            | RR(CI)          |
| Total                        | 0.00(0.00;0.00)    | 0.63(0.55;0.70) | 0.00(0.00;0.00)    | 0.71(0.68;0.73) | 0.00(0.00;0.00)    | 0.74(0.73;0.75) | 0.00(0.00;0.00)    | 0.74(0.72;0.76) |
| Grouped by sex               |                    |                 |                    |                 |                    |                 |                    |                 |
| Female                       | 0.00(0.00;0.00)    | 0.73(0.64;0.81) | 0.00(0.00;0.00)    | 0.81(0.78;0.84) | 0.00(0.00;0.00)    | 0.82(0.80;0.83) | 0.01(0.00;0.01)    | 0.81(0.79;0.83) |
| Male                         | -0.01(-0.02;-0.01) | 0.29(0.26;0.33) | -0.02(-0.02;-0.02) | 0.35(0.34;0.36) | -0.01(-0.01;-0.01) | 0.43(0.42;0.44) | 0.00(-0.01;0.00)   | 0.44(0.42;0.46) |
| Grouped by age               |                    |                 |                    |                 |                    |                 |                    |                 |
| ]18 – 30] years              | 0.00(0.00;0.00)    | 0.56(0.54;0.60) | 0.00(0.00;0.00)    | 0.49(0.47;0.51) | 0.00(0.00;0.00)    | 0.50(0.48;0.52) | 0.00(0.00;0.00)    | 0.69(0.64;0.74) |
| ]30 – 40] years              | 0.01(0.01;0.01)    | 0.57(0.62;0.62) | 0.01(0.01;0.01)    | 0.89(0.86;0.93) | 0.02(0.02;0.02)    | 1.23(1.20;1.25) | 0.02(0.02;0.02)    | 1.21(1.12;1.25) |
| ]40 – 50] years              | -0.01(-0.01;-0.01) | 0.55(0.49;0.62) | 0.00(0.00;0.00)    | 0.63(0.61;0.66) | 0.00(-0.01;0.00)   | 0.71(0.70;0.71) | 0.00(0.00;0.00)    | 0.75(0.73;0.78) |
| ]50 – 60] years              | -0.02(-0.02;-0.01) | 0.89(0.72;1.07) | -0.03(-0.03;-0.02) | 0.81(0.77;0.85) | -0.02(-0.03;-0.01) | 0.71(0.68;0.73) | 0.00(-0.01;0.00)   | 0.68(0.66;0.69) |
| Grouped by education         |                    |                 |                    |                 |                    |                 |                    |                 |
| Short education or unskilled | -0.01(-0.02;-0.01) | 0.66(0.57;0.75) | -0.01(-0.02;-0.01) | 0.75(0.73;0.77) | -0.01(-0.01;-0.01) | 0.63(0.61;0.65) | -0.01(-0.01;-0.01) | 0.60(0.58;0.61) |
| Craftsmen or office          | 0.01(0.01;0.01)    | 0.94(0.87;1.01) | 0.01(0.01;0.01)    | 1.24(1.20;1.28) | 0.01(0.01;0.01)    | 1.49(1.41;1.56) | 0.00(0.00;0.00)    | 1.49(1.40;1.57) |
| Bachelor or Master degree    | 0.00(0.00;0.00)    | 0.66(0.59;0.73) | 0.01(0.01;0.01)    | 0.91(0.87;0.96) | 0.01(0.01;0.01)    | 0.81(0.78;0.84) | 0.02(0.02;0.02)    | 0.72(0.70;0.75) |
| Interdisciplinary            | -0.01(-0.01;-0.01) | 0.35(0.32;0.39) | -0.01(-0.01;-0.01) | 0.37(0.35;0.38) | 0.00(0.00;0.00)    | 0.45(0.43;0.46) | 0.01(0.01;0.01)    | 0.47(0.45;0.48) |
|                              |                    |                 |                    |                 |                    |                 |                    |                 |
|                              | Year 5             |                 | Year 6             |                 | Year 7             |                 |                    |                 |
| Population                   | ARI(CI)            | RR(CI)          | ARI(CI)            | RR(CI)          | ARI(CI)            | RR(CI)          |                    |                 |
| Total                        | -0.01(-0.01;-0.01) | 0.73(0.72;0.75) | -0.01(-0.01;-0.01) | 0.72(0.70;0.74) | -0.01(-0.01;-0.01) | 0.74(0.72;0.77) |                    |                 |
| Grouped by sex               |                    |                 |                    |                 |                    |                 |                    |                 |
| Female                       | -0.01(-0.01;-0.01) | 0.80(0.78;0.82) | -0.01(-0.01;-0.01) | 0.77(0.76;0.79) | 0.00(-0.01;0.00)   | 0.78(0.76;0.80) |                    |                 |
| Male                         | -0.02(-0.02;-0.01) | 0.44(0.42;0.46) | -0.02(-0.02;-0.02) | 0.47(0.45;0.49) | -0.01(-0.01;-0.01) | 0.52(0.50;0.55) |                    |                 |
| Grouped by age               |                    |                 |                    |                 |                    |                 |                    |                 |
| ]18 – 30] years              | -0.01(-0.01;0.00)  | 0.72(0.67;0.78) | -0.01(-0.01;-0.01) | 0.77(0.71;0.83) | -0.01(-0.01;-0.01) | 0.83(0.77;0.89) |                    |                 |
| ]30 – 40] years              | -0.01(-0.01;-0.01) | 1.25(1.19;1.30) | 0.00(0.00;0.00)    | 1.31(1.26;1.37) | 0.00(0.00;0.01)    | 1.42(1.36;1.49) |                    |                 |
| ]40 – 50] years              | -0.02(-0.02;-0.02) | 0.80(0.78;0.82) | -0.02(-0.02;-0.02) | 0.76(0.73;0.78) | -0.01(-0.01;-0.01) | 0.75(0.72;0.77) |                    |                 |
| ]50 – 60] years              | -0.01(-0.02;-0.01) | 0.64(0.63;0.65) | -0.01(-0.01;-0.01) | 0.65(0.64;0.67) | -0.01(-0.02;-0.01) | 0.70(0.68;0.72) |                    |                 |
| Grouped by education         |                    |                 |                    |                 |                    |                 |                    |                 |
| Short education or unskilled | -0.01(-0.01;-0.01) | 0.60(0.59;0.62) | -0.01(-0.01;-0.01) | 0.63(0.61;0.64) | -0.01(-0.01;-0.01) | 0.65(0.63;0.67) |                    |                 |
| Craftsmen or office          | 0.00(0.00;0.00)    | 1.38(1.28;1.48) | 0.00(0.00;0.00)    | 1.18(1.11;1.25) | 0.01(0.01;0.01)    | 1.12(1.03;1.20) |                    |                 |
| Bachelor or Master degree    | -0.01(-0.01;-0.01) | 0.75(0.73;0.77) | 0.00(0.00;0.00)    | 0.70(0.68;0.72) | 0.00(0.00;0.00)    | 0.70(0.67;0.73) |                    |                 |
| Interdisciplinary            | -0.02(-0.02;-0.02) | 0.47(0.46;0.49) | -0.02(-0.02;-0.02) | 0.50(0.48;0.51) | -0.01(-0.01;-0.01) | 0.56(0.53;0.58) |                    |                 |

**Table 4 supplementary:** Absolute risk increase (ARI) and relative risk (RR) with 95% confidence intervals (CI) of a case vs. a control subject being in the “Out” state from one year to seven years after bariatric surgery.
